# Supplementary material for: Exploring the role of spin-triplets and trap states in photovoltaic processes of perovskite solar cells
Source: Royal Society of Chemistry journal article supplement (doi:10.1039/c8tc00455b), 2018-01-01
Supplement: c8tc00455b1.pdf [file c8tc00455b1.pdf]

## Supporting Information

### Exploring the role of spin-triplets and trap states in photovoltaic processes of perovskite solar cells

Kai Lu, Chen Zhao, Luan Lin, Jia-Shun Duan, Yu-Lin Xie, Ming Shao\*, and Bin Hu\*

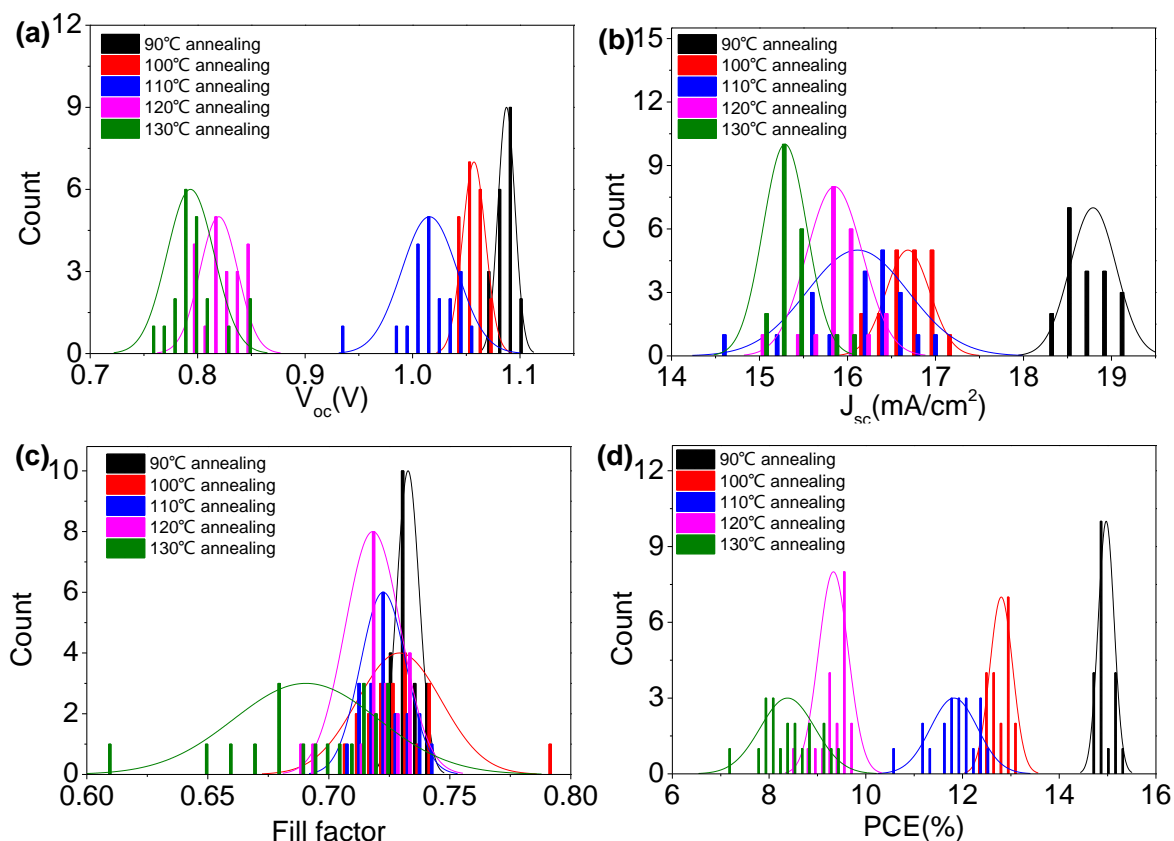

**Figure. S1** Histogram analyses of (a) $V_{oc}$ , (b) $J_{sc}$ , (c)Fill Factor and (d)PCE of 20 devices for each annealing temperature at 90°C, 100°C, 110°C, 120°C and 130°C, respectively.

**Table. S1** Average value of the photovoltaic parameters for the PSCs annealing at different temperature.

| Annealing temperature | Average $V_{oc}$ (V) | Average $J_{sc}$ (mA/cm <sup>2</sup> ) | Average FF | Average PCE(%) |
|-----------------------|----------------------|----------------------------------------|------------|----------------|
| 90°C                  | 1.09±0.008           | 18.79±0.262                            | 0.73±0.005 | 14.97±0.165    |
| 100°C                 | 1.06±0.011           | 16.67±0.250                            | 0.73±0.017 | 12.80±0.236    |
| 110°C                 | 1.02±0.026           | 16.11±0.577                            | 0.72±0.009 | 11.83±0.487    |
| 120°C                 | 0.82±0.018           | 15.85±0.317                            | 0.72±0.011 | 9.33±0.309     |
| 130°C                 | 0.79±0.022           | 15.29±0.249                            | 0.69±0.030 | 8.38±0.567     |

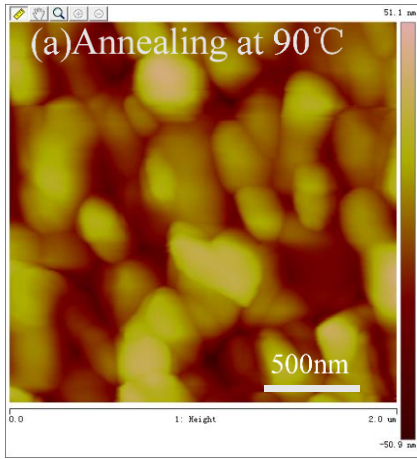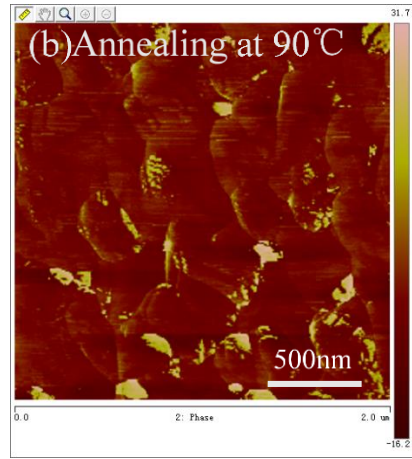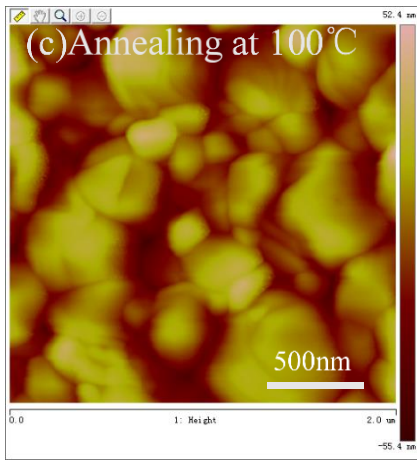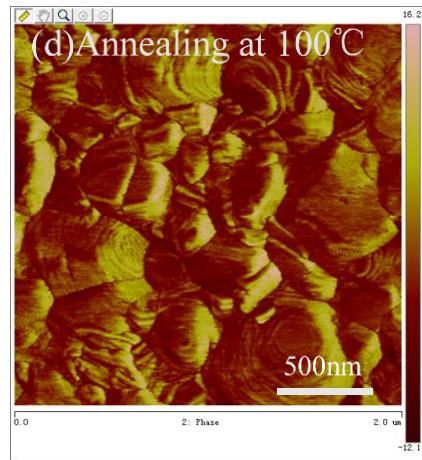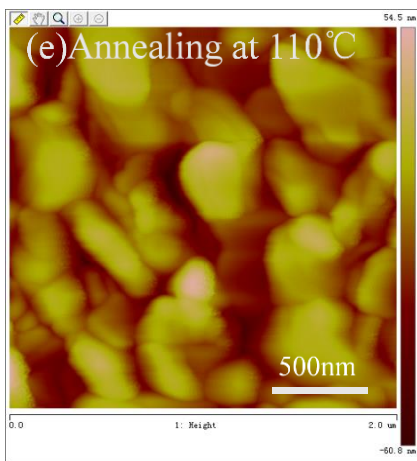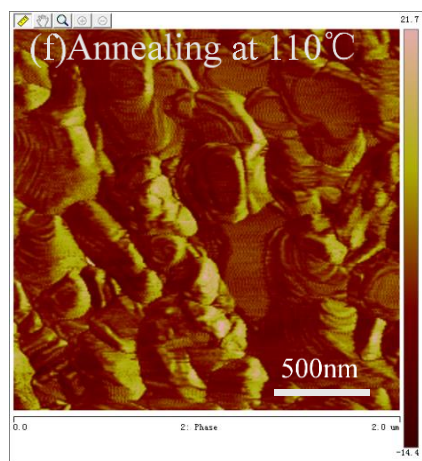

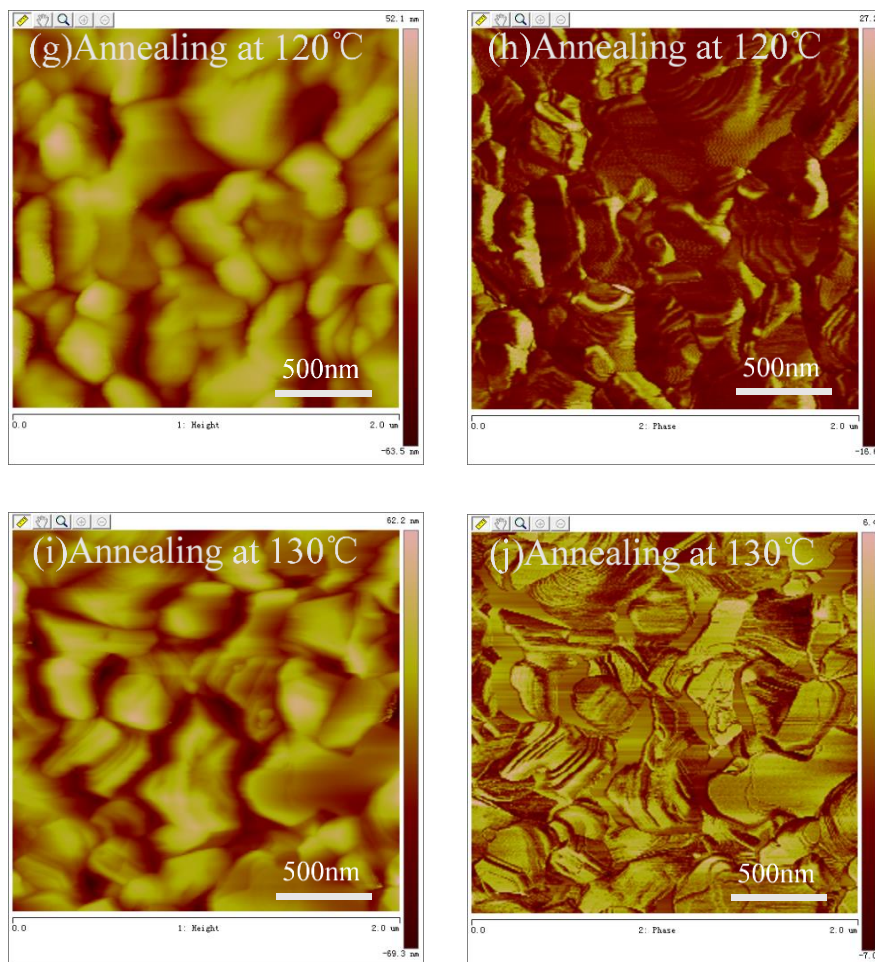

**Figure. S2** Atomic force microscopy(AFM) 2D topography(a, c, e, g, i) and phase(b, d, f, h, j) images of the perovskite films annealing at 90°C,100°C,110°C,120°C,130°C.
